# Supplementary material
Source: publisher site journal article supplement (https://www.degruyterbrill.com/publication/journal_key/JCCALL/downloadAsset/JCCALL_Instructions_for_Authors.pdf)
Supplement: Supplementary file 1 [file JCCALL_Instructions_for_Authors.pdf]

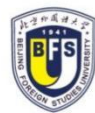

北京外国语大学  
Beijing Foreign Studies University

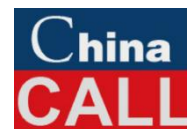

*Call for papers*  
*Journal of China Computer-Assisted Language Learning*  
*Manuscript Guidelines*

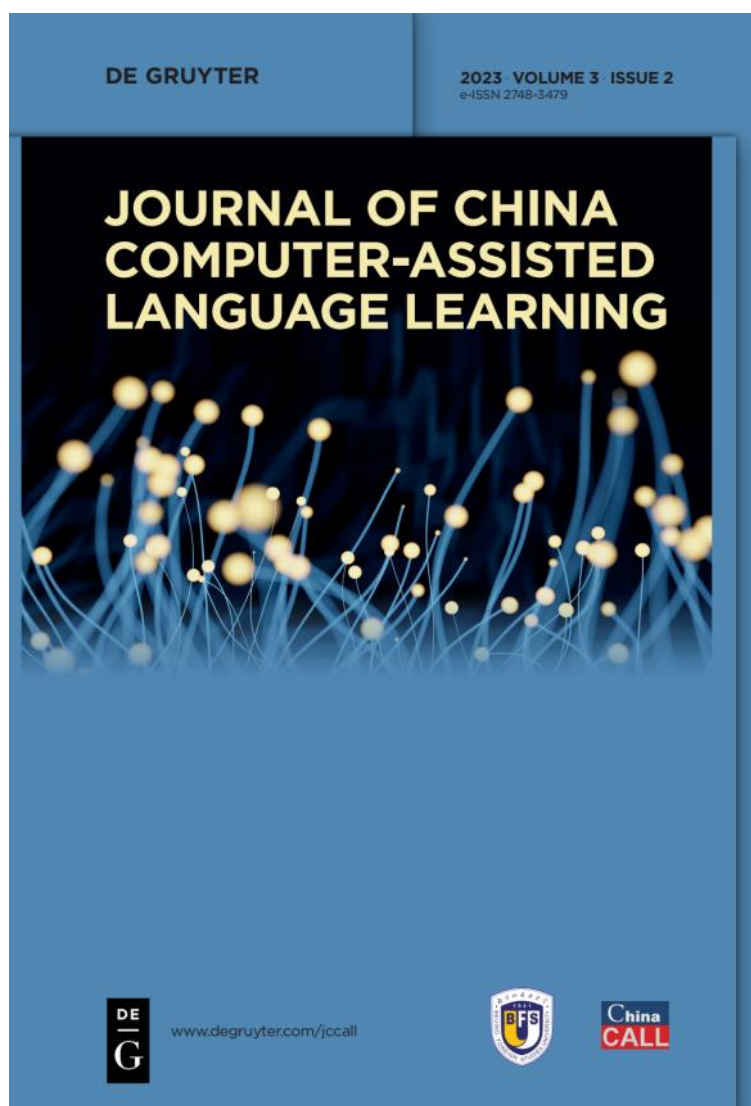

***Editors-in-Chief:***

GU Yueguo, Beijing Foreign Studies University, China

TANG Jinlan, Beijing Foreign Studies University, China

***Associate Editors:***

MA Qing, The Education University of Hong Kong, China

Prithvi N. SHRESTHA, The Open University, UK



*Journal of China Computer-Assisted Language Learning* (e-ISSN: 2748-3479), initiated by Beijing Foreign Studies University, is the official journal of ChinaCALL, an affiliate of China Association for Comparative Studies of English and Chinese. The journal seeks to provide an international platform for exchanging ideas, innovations and findings regarding computer-assisted language learning. Research articles and critical reviews are especially welcome in related promising fields. The journal is peer-reviewed, published in English, open-access and issued twice a year by De Gruyter and Foreign Language Teaching and Research Press (Inaugural Issue: September 26th, 2021).

Recently published papers are available at the journal homepage:

<https://www.degruyter.com/journal/key/jccall/html>

*All manuscript submissions will undergo a double-blind peer review. Final decision regarding acceptance/revision/rejection will be based on the reviews received from at least two independent, anonymous expert referees.*

*Its scope includes but not limited to the following topics:*

1. Technology and language education
2. CALL environment
3. CALL & language teacher education
4. Web-based instructional design for foreign/second language instruction
5. Web-based language assessment
6. CALL learners
7. Modality of learning
8. Web-based and resource-driven learning
9. Using the Internet for cultural exchange
10. Corpus-based and data-driven learning
11. Mobile language learning
12. Fostering autonomous learning through technology
13. Lessons learnt in CALL
14. E-learning, collaborative learning and blended learning
15. MOOCs
16. Managing multimedia/hypermedia environments
17. CALL in vocational education
18. Using Artificial Intelligence in education



## Manuscript requirements:

1. Within **7,000-10,000 words** (excluding abstracts, references and appendixes) are required for manuscripts of review papers and research articles; practice-oriented papers should be within **3,000-4,000 words**, and book/technological tool reviews should be within **1,500-2,000 words**.
2. All manuscripts should follow the Unified Style, Linguistics and Mouton reference style. (see the journal homepage "Supplementary Materials" section).
3. All manuscript should also contain an abstract within 150-200 words and 5-10 keywords.
4. All manuscripts should be submitted via:  
<https://mc.manuscriptcentral.com/jccall>
5. For inquiries, please send an email to editorial office via: [ai@bfsu.edu.cn](mailto:ai@bfsu.edu.cn)
6. All manuscripts must be properly anonymized and submitted in an editable document format such as Microsoft Word (.docx). Please include all sections of your manuscript (e.g., Tables, Figures, Appendices, etc.) in one file.

## Article Structure

### *Subdivision - numbered sections*

Divide your article into clearly defined and numbered sections. Subsections should be numbered

1.1 (then 1.1.1, 1.1.2, ...), 1.2, etc. (the abstract is not included in section numbering). Use this numbering also for internal cross-referencing: do not just refer to 'the text'. Any subsection may be given a brief heading. Each heading should appear on its own separate line.

### 1 Introduction

State the objectives of the work and provide an adequate background, avoiding a detailed literature survey or a summary of the results.

### 2 Literature review

### 3 Research design/methodology

*Provide research questions; material and methods in sufficient detail to allow the work to be replicated. Methods already published should be indicated by a reference.*

### 4 Results

Results should be clear and concise.



## 5 Discussion

This should explore the significance of the results of the work, not repeat them. A combined Results and Discussion section is often appropriate. Avoid extensive citations and discussion of published literature.

## 6 Conclusions

The main conclusions of the study should be presented in a short Conclusions section, which should not simply repeat earlier sections.

## Appendices

If there is more than one appendix, they should be identified as A, B, etc. Formulae and equations in appendices should be given separate numbering: Eq. (A.1), Eq. (A.2), etc.; in a subsequent appendix, Eq. (B.1) and so on. For tables and figures: Table 1; Figure 1, etc.

## Guidelines on Types of Papers

The journal encourages submissions of the following types of papers:

1. **Research articles:** Within 7,000-10,000 words (excluding abstract, references and appendixes) with at least 20 references. The papers should engage qualitative or quantitative analysis based on experiments or data. The author should bring about new views or evidence, or argue against present views or evidence.
2. **Review papers:** Within 7,000-10,000 words (excluding abstract, references and appendixes) with at least 50 references. The papers should reflect the most recent research achievements in related disciplines and should focus on discussion and evaluation. The author should bring his/her originality to the reviewed topic and look into the prospects of future research.
3. **Practice-oriented papers:** Within 3,000-4,000 words (excluding abstract, references and appendixes). The style should be “teacher friendly” to provide practical significance for curriculum, pedagogical innovation, learning practice, teacher education, etc.
4. **Book/Technological tool reviews:** The reviews should go beyond a mere listing of the contents of a book/technological tool, and should normally include a critical evaluation of the main ideas being discussed. Book/Technological reviews should be within 1,500-2,000 words, but the editors will accept longer reviews where seminal books or important technological tools are concerned.
